# Supplementary material for: Imidazole-promoted 1,4-migration of the tert-butyldiphenylsilyl group: influence on the selectivity control of the silylation reactions of carbohydrate OH groups
Source: Royal Society of Chemistry journal article supplement (doi:10.1039/b204396c), 2002-01-01
Supplement: b204396c.doc [file b204396c.doc]

# Supplementary data

Imidazole-promoted 1,4-migration of *tert*-butyldiphenylsilyl group: influence on the selectivity control of the silylation reactions of carbohydrate OH groups

**General procedures**

Melting points are uncorrected. IR spectra were recorded on a Perkin-Elmer Model 883 spectrophotometer and the samples were prepared by evaporation of a solution of the compound in CHCl3 or Et2O onto NaCl plate under a stream of argon. All NMR spectra (1H, 13C, double resonance -decoupling- experiments, DEPT 1H-1H COSY-45 and 1H-13C HETCOR) were recorded on a Varian UNITY 300 MHz or 500 MHz spectrometer in CDCl3 at 298 K using standard pulse sequences. Chemical shifts are reported relative to the residual CHCl3 (H 7.24 ppm)or CDCl3 (C 77.00 ppm); coupling constants (*J*) are given in Hz. Lorentz-Gauss transformation was used to improve the resolution of the 1H NMR spectra.

Methyl -L-rhamnopyranoside (**3)** was obtained in a yield of 81% using Dowex-50 or Amberlite IR-120 (H+) resin as catalyst (*versus* 65% with HCl17). A suspension of L-rhamnose (5.4 g, 33 mmol) and 12 g of resin in 150 ml of dry methanol was stirred for 16 h at 70 ºC. The mixture was then filtered, concentrated at reduced pressure and purified by flash chromatography (EtOAc-methanol, 95:15) furnishing **3** (4.76 g, Rf 0.28) as a colourless syrup. Methyl 2,3*-O-*isopropylidene--L-rhamnopyranoside22 (**4)** methyl -L-fucopyranoside18 (**5)** as well as phenyl 1-thio--D-manopyranoside19 (**6)** and phenyl 1-thio--L-fucopyranoside20 (**7**) were prepared and purified as described previously. Solvents were dried using standard methods.

All reactions were carried out under nitrogen atmosphere. Substrates were dried by evaporation with toluene and placed under vacuum overnight. The composition of the reaction mixtures was determined by 1H NMR spectroscopy. Thin-layer chromatography (TLC) was performed on precoated Kieselgel 60 F254 plates; eluent systems, A 4:1, B 3:1, C 9:1, D 7:3 hexane-EtOAc and E 95:5 dichloromethane-acetone; detection was first by UV and then charring with sulfuric acid in ethanol (1:4, v/v). Column chromatography was performed on silica gel. Acetylation reactions were achieved with an excess of acetic anhydride in pyridine at room temperature or 50 ºC for 24 h.

**General method for silylation reactions.** To a stirred solution of the methyl glycoside **1**-**5** or the phenyl thioglycoside **6**,**7** (1-20mmol) in dry DMF at the selected temperature were added imidazole and *tert-*butylchlorodiphenylsilane (molar ratio substrate: TBDPSCl: imidazole 1:1:2.5, 1:1:5 or 1:2.2:5, [substrate] = 0.25 M). The resultant solution was stirred for the reaction time (Table 1). The reaction mixture was quenched with a saturated solution of NH4Cl (the imidazole must be removed from the reaction mixture to avoid the isomerization during the workup) and diluted with Et2O. The organic layer was separated and the aqueous phase extracted several times with Et2O. The combined organic fractions were washed with water and brine, dried (MgSO4) and the solvent evaporated to yield the crude product mixture.

**General procedure for isomerization reactions.** A solution of the TBDPS ether (0.5-1 mmol) and the imidazole (molar ratio substrate: imidazole 1:5 or 1:2.5) in dry DMF (5.5-11 ml, [substrate]= 0.09M) was stirred at 20 ºC for the appropriate time (Table 2). The reaction was quenched and worked up as just described. Proofs in dry DMF, pyridine, pyridine-DMF (1:1), 2,6-di-*tert*-butylpyridine-CH2Cl2 (molar ratio substrate:base 1:20) or pyridine-H2O (5%) were performed according to a similar method.

**TBDPS ethers**

The silyl derivatives **8**-**30** were isolated from the reaction mixtures obtained in the silylation and/or isomerization processes. In the latter cases, yields of the isolated products were practically quantitative. Their purity was tested by TLC, 1H NMR spectroscopy and analytical data.

The structure of all the compounds was confirmed by 1H and 13C NMR spectroscopy. 2D NMR techniques (1H-1H COSY and1H-13C correlation spectra) and double resonance (spin decoupling) experiments were used for the identification and unambiguous assignment of the proton and carbon resonances.3a,26 NMR data are given in Tables 1S-5S. The substitution patterns were established on the basis of the characteristic downfield shifts observed in the 1H NMR spectra of the corresponding *O*-acetylated derivatives.27 In several cases the protons at positions bearing OH groups could be also identified by the observation of the vicinal coupling constants with the OH protons. The assignment of the anomeric configuration was carried out taking into account the value of the 13C-1H direct coupling constants for the C-1 carbon, 1*J*CH, and the vicinal coupling constants between 1-H and 2-H in the case of the gluco, galacto and fuco derivatives.3a,26

**Methyl 6*-O-*, 2,6-, 3,6- and 4,6-di*-O-tert*-butyldiphenylsilyl--D-glucopyranosides 8-11.** The bis-TBDPS ethers **9**-**11** were obtained by disylilation of **1** (3.9 g, 20 mmol) at 20 ºC for 24 h, following the general procedure. Purification by flash chromatography (system A) afforded the 2,6-bis-TBDPS ether **9** (12.2 g, 91%) as a white crystalline solid, mp 60-62 ºC, along with **10** (268 mg, 2%) and **11** (268 mg, 2%) as colourless syrups. When the reaction was carried out at 4 ºC for 24 h, **9** (63%) and the 6-TBDPS ether **8**9a,c (30%), white crystalline solid, mp 124-126 ºC (lit.9c 126-128 ºC), were isolated by flash chromatography using gradient elution (hexane-EtOAc 4:11:1). TLC (system A): Rf 0.63 (**10**), 0.43 (**9**), 0.14 (**11**), 0.01 (**8**) (Found: **8**: C, 64.1; H, 7.3. Calc. for C23H32O6Si: C, 63.9; H, 7.5 %) (Found: **9**: C, 69.6; H, 7.7; **10**: C, 69.7; H, 7.4; **11**: C, 70.0; H, 7.4. Calc. for C39H50O6Si2: C, 69.8; H, 7.5 %); max/cm-1 3405 (**8**), 3388 (**9**), 3571 (**10**) and 3561 and 3447 (OH) (**11**).

**Methyl 6*-O-*, 2,6-, 3,6- and 4,6-di*-O-tert*-butyldiphenylsilyl--D-galactopyranosides 12-15.** Application of the general procedure for the disilylation of **2** (3.9 g, 20 mmol) at 20 ºC for 48 h gave after purification by column chromatography (hexane-EtOAc 98:21:1) the 2,6-bis-TBDPS ether **13** (8.7 g, 65%) as a white crystalline solid (mp 45-47 ºC), the silyl derivatives **14** (1.9 g, 14%) and **15** (134 mg, 1%) as viscous oils and the 6-TBDPS ether **12**9b,d (86 mg, 1%) as an amorphous solid. TLC (system B): Rf 0.63 (**13**), 0.43 (**14**), 0.16 (**15**), 0.02 (**12**) (Found: **12**: C, 63.7; H, 7.7. Calc. for C23H32O6Si: C, 63.9; H, 7.5 %) (Found: **13**: C, 69.9; H, 7.4; **14**: C, 69.65; H, 7.6; **15**: C, 69.6; H, 7.7. Calc. for C39H50O6Si2: C, 69.8; H, 7.5 %); max/cm-1 3399 (**12**), 3436 (**13**), 3345 (**14**) and 3438 (OH) (**15**).

**Methyl 2-, 3- and 4*-O-tert*-butyldiphenylsilyl--L-rhamnopyranosides 16-18.** Monosilylation of **3** (1.8 g, 10 mmol) at 20 ºC for 24 h using a molar ratio substrate:imidazole 1:5 gave, after column chromatography (system E), the 2- and 3-TBDPS ethers as viscous oils (**16**, 926 g, 22%; **17**, 1.8 g, 43%) plus a mixture of the three isomers **16**-**18** (10%). TLC (system E): Rf 0.70 (**17**), 0.56 (**18**), 0.44 (**16**).

Silylation of the methyl 2,3*-O-*isopropylidene--L-rhamnopyranoside (**4**, 218 mg, 1 mmol) at 20 ºC for 24 h and purification by column chromatography (hexane-EtOAc 99:1) afforded the methyl 4*-O-tert*-butyldiphenylsilyl-2,3*-O-*isopropylidene--L-rhamno- pyranoside **20** (223 mg, 49%) as a viscous oil. TLC (system C): Rf 0.23 (Found: C, 68.5; H, 7.8. Calc. for C26H36O5Si: C, 68.4; H, 7.95 %). Deacetonation of **20** with trifluoroacetic acid-water (1%) following the method previously described by Borbás and Lipták28 provided the 4-TBDPS ether **18**, as a waxy solid, in quantitative yield. (Found: **16**: C, 66.0; H, 8.0; **17**: C, 66.1; H, 7.8; **18**: C, 66.1; H, 7.8. Calc. for C23H32O5Si: C, 66.3; H, 7.7 %); max/cm-1 3391 (**16**), 3487 (**17**) and 3435 (OH) (**18**).

**Methyl 2,4-di*-O-tert*-butyldiphenylsilyl--L-rhamnopyranoside 19.** Application of the general procedure for the disilylation of **3** (180 mg, 1 mmol) at 48 ºC for 72 h led, after column chromatography (hexane-AcOEt 98:29:1), to the isolation of the 2,4-bis-TBDPS ether **19** as a viscous oil (327 mg, 50%). TLC (system C): Rf 0.88 (Found: C, 71.4; H, 7.6. Calc. for C39H50O5Si2: C, 71.5; H, 7.7 %); max/cm-1 3571 (OH).

**Methyl 2-, 3- and 4*-O-tert*-butyldiphenylsilyl--L-fucopyranosides 21-23.** The titled compounds were obtained by monosilylation of **5** (1.8 g, 10 mmol) at 20 ºC for 48 h following the general procedure. The residue was purified by flash chromatography (system D) to give the TBDPS ethers **21** (2.3 g, 56%), **22** (583 mg, 14%) and **23** (83 mg, 2%) as viscous oils along with a mixture of **21** and **22** (10%). TLC (system D): Rf 0.52 (**22**), 0.41 (**21**), 0.27 (**23**) (Found: **21**: C, 66.2; H, 7.6; **22**: C, 66.2; H, 7.8; **23**: C, 66.1; H, 7.9. Calc. for C23H32O5Si: C, 66.3; H, 7.7 %); max/cm-1 3436 (**21**), 3573 and 3480 (**22**) and 3448 (OH) (**23**).

**Phenyl 6*-O-*, 2,6-, 3,6- and 4,6-di*-O-tert*-butyldiphenylsilyl-1-thio--D-manno pyranosides 24-27.** These compounds were obtained by disilylation of **6** (2.7 g, 10 mmol) at 20 ºC for 8 h, following the general procedure and the residue was purified by column chromatography. Elution was started with hexane-EtOAc 9:1 to separate a by-product (ButPh2SiOH) coming from the hydrolisis of the reagent and the 3,6-bis-TBDPS ether **26** (3.75 g, 50%) as a waxy solid; elution then with hexane-EtOAc 4:1 afforded the 2,6-bis-TBDPS ether **25** (1.6 g, 21%) as a white crystalline solid (mp 58-60 ºC), and a mixture of **25** and **27** in a ratio of 1:1 (75 mg, 1%); for elution of the monosilyl derivative **24** (613 mg, 12%; white crystalline solid, mp 53-54 ºC) hexane-EtOAc 1:1 was employed. TLC (system A): Rf 0.62 (**26**), 0.36 (**25** and **27**), 0.03 (**24**) (Found: **24**: C, 65.7; H, 6.8; S, 6.15. Calc. for C28H34O5SSi: C, 65.85; H, 6.7; S, 6.3 %) (Found: **25**: C, 70.05; H, 7.0; S, 4.1; **26**: C, 70.3; H, 7.1; S, 4.1. Calc. for C44H52O5SSi2: C, 70.55; H, 7.0; S, 4.3 %); max/cm-1 3401 (**24**), 3414 (**25**) and 3574 (OH) (**26**).

**Phenyl 2-, 3- and 4*-O-tert*-butyldiphenylsilyl-1-thio--L-fucopyranosides 28-30.** Application of the general procedure for the monosilylation of **7** (512 mg, 2 mmol) at 20 ºC for 48 h afforded, after column chromatography (hexane-EtOAc 95:585:15), the TBDPS ethers **29** (613 mg, 62%) and **30** (173 mg, 18%) as viscous oils. By rearrangement of **29** with imidazole (molar ratio substrate: imidazol 1:5) for 8 h, the 2-TBDPS ether **28** was isolated in 10% yield as a viscous oil along with **29** (55%) and **30** (30%). TLC (system A): Rf 0.60 (**29**), 0.20 (**30**), 0.15 (**28**) (Found: **28**: C, 67.8; H, 7.1; S, 6.3; **29**: C, 68.0; H, 6.8; S, 6.4; **30**: C, 67.8; H, 6.8; S, 6.6. Calc. for C28H34O4SSi: C, 68.0; H, 6.9; S, 6.5 %); max/cm-1 3435 (**28**), 3572 (**29**) and 3447 (OH) (**30**).

**References**

1. R. Toman, J. Rosik and J. Adölfi, *Carbohydr. Res.*, 1986, **158**, 236-244; S. Hanessian and M. Kagotani, *Carbohydr. Res.*, 1990, **202**, 67-69; K. Ágoston, A. Dobó, J. Rákó, J. Kerékgyártó and Z. Szurmai, *Carbohydr. Res.*, 2001, **330**, 183-190.
2. A. Borbás and A. Lipták, *Carbohydr. Res.*, 1993, **241**, 99-116.

| **Table 1S** 1H chemical shifts for compounds **8**-**15** and **24**-**27ª** | | | | | | | | | |
| --- | --- | --- | --- | --- | --- | --- | --- | --- | --- |
| Compound | 1-H | 2-H | 3-H | 4-H | 5-H | 6-H | 6'-H | 1-OCH3 | C(CH3)3 |
| **8**  **9**  **10**  **11**  **12**  **13**  **14**  **15**  **24**  **25**  **26**  **27d** | 4.69 d  4.20 d  4.67 d  4.69 d  4.77 d  4.26 d  4.68 d  4.88 d  5.47 d  5.09 d  5.44 d  5.42 d | 3.49 dd  3.58 dd  3.58 ap td  3.31 dd  3.81 m  3.94 dd  3.90 m  3.97 m  4.18 ap dd  4.31 dd  3.86 mb  4.04 ddd | 3.73 ap t  3.93 apt d  3.75 ap t  3.76 ap t  3.70 dd  3.97 m  3.82 dd  3.56 m  3.84 ddd  3.74 ap td  3.97 mc  3.83 ddd | 3.47 ap t  3.41 apt d  3.58 ddd  3.49 dd  4.08 m  4.05 br s  3.79 br s  3.94 br d  3.92 apt d  4.13 ap t  3.97 mc  3.86 ap t | 3.61 m  3.59 m  3.46 ddd  3.79 m  3.75 m  3.76 m  3.56 br t  3.55 m  4.17 ap dt  4.10 m  3.97 mc  4.35 m | 3.89 dd  3.81 dd  3.85 dd  3.97 dd  3.90 dd  3.83 dd  3.81 dd  3.70 dd  3.92 dd  3.96 dd  3.86 mb  3.96 dd | 3.82 dd  3.75 dd  3.77 dd  3.65 dd  3.85 dd  3.74 dd  3.73 dd  3.27 dd  3.90 dd  3.92 dd  3.86 mb  3.81 dd | 3.33 s  3.19 s  3.28 s  3.43 s  3.33 s  3.17 s  3.23 s  3.33 s | 1.03 s  1.08 s, 1.00 s  1.06 s, 1.04 s  1.00 s, 0.93 s  1.04 s  1.08 s, 1.02 s  1.10 s, 1.01 s  0.98 s, 0.93 s  1.05 s  1.08 s, 1.07 s  1.12 s, 1.04 s  1.00 s, 0.97 s |
| a H(300 MHz for **11**, **12**, **14**, **15** and **25-27**, 500 MHz for **8**-**10**, **13** and **24**); aromatic protons appear as complex multiplets between *ca*.7.8 and 7.0 ppm.  b,c The values given correspond to the centre of the multiplets of the overlapped signals at 3.87-3.84 and 4.01-3.93 ppm.  d Values deduced from a mixture of **25** and **27** in a ratio of 1:1. | | | | | | | | | |

| **Table 2S** 1H chemical shifts for compounds **16**-**23** and **28**-**30**ª | | | | | | | | |
| --- | --- | --- | --- | --- | --- | --- | --- | --- |
| Compound | 1-H | 2-H | 3-H | 4-H | 5-H | 6-(CH3) | 1-OCH3 | C(CH3)3 |
| **16**  **17**  **18**  **19**  **20c**  **21**  **22**  **23**  **28**  **29**  **30** | 4.26 d  4.59 d  4.57 d  4.06 d  4.73 s  4.24 d  4.66 d  4.84 d  4.64 d  4.35 d  4.40 d | 3.99 dd  3.71 m  3.77 dd  3.83 dd  4.04 d  3.93 dd  3.87 m  4.00 apt d  3.69 ap t  3.76 apt d  3.73 td | 3.58 mb  3.90 dd  3.80 ap dt  3.73 ap td  4.17 ap t  3.98 ap dt  3.81 dd  3.65 m  3.62 md  3.66 dd  3.47 ddd | 3.58 mb  3.56 m  3.52 ap t  3.65 ap t  3.34 dd  3.74 td  3.42 dt  3.88 dd  3.62 md  3.42 br d  3.80 br d | 3.58 mb  3.47 dq  3.72 dq  3.71 dq  3.65 dq  3.89 qd  3.66 qd  3.70 qd  3.62 md  3.41 qd  3.47 qd | 1.35 d  1.24 d  1.25 d  1.32 d  1.03 d  1.19 d  1.20 d  0.90 d  1.28 d  1.27 d  1.06 d | 3.08 s  3.24 s  3.35 s  3.06 s  3.34 s  3.21 s  3.27 s  3.37 s | 1.09 s  1.10 s  1.05 s  1.04 s, 0.84 s  1.04 s  1.08 s  1.10 s  1.08 s  1.09 s  1.08 s  1.02 s |
| a H(300 MHz except for **19**-**21**, in which cases the spectra were recorded at 500 MHz); aromatic protons appear as complex multiplets between *ca*.7.8 and 7.0 ppm.  b,d The values given correspond to the centre of the multiplets of the overlapped signals at 3.62-3.54 (**16**) and 3.66-3.58 ppm (**28**).  c (CH3)2C group: 1.21 (s,3H), 1.07 ppm (s, 3H). | | | | | | | | |

| **Table 3S** 1H-1H coupling constants for compounds **8**-**15** and **24**-**27** | | | | | | | | | | | |
| --- | --- | --- | --- | --- | --- | --- | --- | --- | --- | --- | --- |
| Compound | *J*1,2 | *J*2,3 | *J*3,4 | *J*4,5 | *J*5,6 | *J*5,6' | *J*6,6' | *J*2,OH | *J*3,OH | *J*4,OH |  |
| **8**  **9**  **10**  **11**  **12**  **13**  **14**  **15**  **24**  **25**  **26**  **27** | 3.7  3.7  3.9  3.9  3.7  2.9  3.9  4.0  1.3  1.5  1.5  2.2 | 9.4  9.3  9.0  9.5  9.2  9.5  9.3  10.0  3.3  3.3  2.9 | 9.2  10.0  8.6  8.4  4.0  3.3  3.3  2.9  9.2  9.0  8.4 | 9.7  9.7  9.8  9.7  1.1  1.1  9.4  9.5  9.5 | 3.7  4.4  2.7  1.8  6.4  7.0  6.6  7.3  5.2  3.9  2.2 | 5.3  4.8  5.1  6.2  5.0  4.8  6.0  4.0  4.8  4.2  5.9 | -10.9  -10.7  -11.0  -10.8  -10.6  -10.3  -10.1  -10.6  -11.8  -10.8  -11.2 | 8.8  8.8  9.2  8.8  4.3  2.6  4.6 | 2.8  2.6  6.6  5.2  8.8  5.9 | 2.6  3.7  2.6  2.9  1.3  2.5  2.8 |  |

| **Table 4S** 1H-1H coupling constants for compounds **16**-**23** and **28**-**30** | | | | | | | | |
| --- | --- | --- | --- | --- | --- | --- | --- | --- |
| Compound | *J*1,2 | *J*2,3 | *J*3,4 | *J*4,5 | *J*5,6 | *J*2,OH | *J*3,OH | *J*4,OH |
| **16**  **17**  **18**  **19**  **20**  **21**  **22**  **23**  **28**  **29**  **30** | 1.5  1.8  1.6  1.8  3.3  3.7  4.0  9.3  9.5  9.3 | 2.9  3.7  3.6  3.1  5.7  9.5  9.5  10.0  8.3  8.8  9.3 | 8.8  8.9  8.8  7.0  2.9  3.3  2.9  3.5  2.9 | 9.5  9.1  9.1  9.6  1.5  1.5  1.1  1.3  0.9 | 5.5  6.2  6.2  6.0  6.3  6.6  6.6  6.8  6.6  6.4  6.4 | 2.2  9.5  9.5  2.6  1.8 | 3.5  10.1  3.7  6.8  7.0 | 3.7  2.9  1.5 |

| **Table 5S** 13C chemical shifts for compounds **8-30**ª | | | | | | | | | | |
| --- | --- | --- | --- | --- | --- | --- | --- | --- | --- | --- |
| Compound | | C-1b | C-2 | C-3 | C-4 | C-5 | C-6 | 1-OCH3 | C(**C**H3)3 | **C**(CH3)3 |
| **8** | 99.2 | | 72.2 | 74.6 | 71.6 | 71.2 | 64.4 | 55.1 | 26.9 | 19.4 |
| **9** | 99.2 | | 74.0 | 74.3 | 71.8 | 70.6 | 64.6 | 54.7 | 27.0, 26.8 | 19.4, 19.2 |
| **10** | 99.4 | | 72.9c | 77.8 | 71.6c | 71.6 | 63.8 | 55.0 | 27.1, 26.9 | 19.7, 19.3 |
| **11** | 98.5 | | 72.9d | 75.3 | 73.0d | 72.0 | 63.7 | 55.0 | 27.1, 26.8 | 19.6, 19.3 |
| **12** | 99.4 | | 69.8d | 71.4 | 69.5 | 69.9d | 63.5 | 55.3 | 26.8 | 19.2 |
| **13** | 99.5 | | 70.9c | 71.6c | 69.4 | 69.6 | 63.2 | 54.9 | 27.0, 26.8 | 19.4, 19.2 |
| **14** | 99.7 | | 69.8 | 73.6 | 69.4 | 69.9 | 62.8 | 55.2 | 27.1, 26.9 | 19.4, 19.2 |
| **15** | 99.2 | | 72.7d | 72.3d | 72.3d | 70.2 | 64.2 | 54.9 | 27.2, 26.8 | 20.0, 19.0 |
| **16** | 100.4 | | 72.8 | 72.3c | 74.0c | 67.6 | 17.8 | 54.7 | 27.0 | 19.6 |
| **17** | 100.2 | | 71.1 | 74.5 | 73.6 | 67.3 | 17.3 | 54.7 | 27.1 | 19.4 |
| **18** | 100.2 | | 71.0c | 71.8c | 76.0 | 67.9 | 18.1 | 54.9 | 27.2 | 19.7 |
| **19** | 99.9 | | 73.1 | 71.9 | 76.3 | 68.6 | 18.7 | 54.7 | 27.2, 26.9 | 19.9, 19.3 |
| **20e** | 98.0 | | 75.8 | 78.8 | 76.5 | 65.8 | 18.1 | 54.8 | 27.1 | 19.7 |
| **21** | 99.5 | | 71.4c | 71.0c | 71.9 | 65.2 | 16.0 | 55.0 | 27.0 | 19.4 |
| **22** | 99.8 | | 69.4 | 73.8 | 72.3 | 65.2 | 16.2 | 55.3 | 27.1 | 19.4 |
| **23** | 99.6 | | 69.9 | 72.3 | 74.9 | 67.1 | 17.2 | 55.3 | 27.3 | 20.1 |
| **24** | 87.9 | | 71.9d | 72.2 | 70.7 | 71.7d | 65.1 |  | 26.9 | 19.2 |
| **25** | 88.5 | | 74.1 | 72.8 | 70.3 | 72.8 | 64.7 |  | 27.0, 26.9 | 19.5, 19.3 |
| **26** | 87.4 | | 72.5 | 73.1 | 69.3 | 74.7 | 64.3 |  | 27.1, 26.9 | 19.4, 19.3 |
| **27f** | 87.3 | | 72.1 | 72.4 | 70.3 | 74.7 | 63.6 |  | 27.0, 26.8 | 19.5, 19.2 |
| **28** | 89.0 | | 72.7c | 76.0 | 71.9 | 74.2c | 16.6 |  | 27.2 | 19.7 |
| **29** | 88.6 | | 69.8 | 77.3 | 72.0c | 74.2c | 16.7 |  | 27.0 | 19.4 |
| **30** | 87.5 | | 69.1 | 76.1 | 74.4c | 75.9c | 17.8 |  | 27.3 | 20.0 |
| a C(75 MHz, except for **8-10**, **13,** **19-21** and **24**, in which cases the spectra were recorded at 125 MHz); aromatic carbons, TBDPS groups: 127-128 (*m*-C), 129-130 (*p*-C), 132-134 (C-*ipso*), 135-136 ppm (*o*-C); PhS groups: 127-128 (*p*-C), 128-129 (*m*-C), 130-132 (*o*-C), 132-134 ppm (C-*ipso*) b 1*J*CH = 167  2 Hz for **8-27** and 1*J*CH = 157  2 Hz for **28-30**.  c Tentative assignment.  d Interchangeable signals.  e (CH3)2C group: 26.3, 27.4, 108.9 ppm.  f Values deduced from a mixture of **25** and **27** in a ratio of 1:1. | | | | | | | | | | |
